# Supplementary material for: Aberrant Dynamic Functional Network Connectivity and Graph Properties in Major Depressive Disorder
Source: PubMed Central journal article supplement (PMC6080590; doi:10.3389/fpsyt.2018.00339), 2018-07-31
Supplement: Presentation_1.pdf [file Presentation_1.pdf]

*Supplementary Material*

## Supplementary Figures and Tables

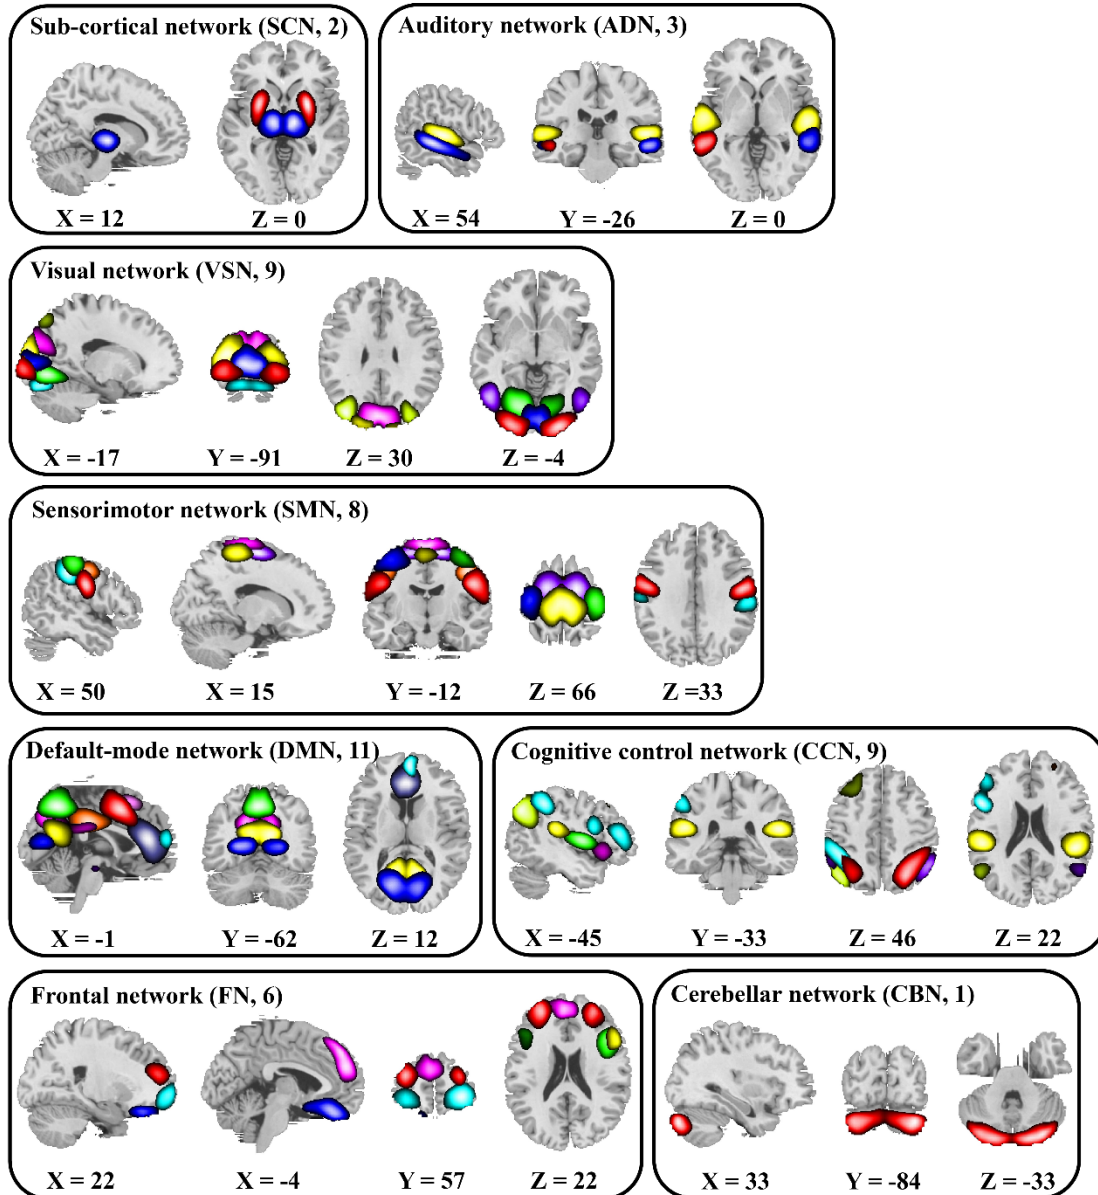

**Figure S1. Spatial maps of the identified 49 intrinsic connectivity networks (ICNs), sorted into eight networks.** Each color in the spatial maps corresponds to a different ICN. The detailed spatial map, component label, peak coordinate and volume are provided in the Supplementary Table S3.

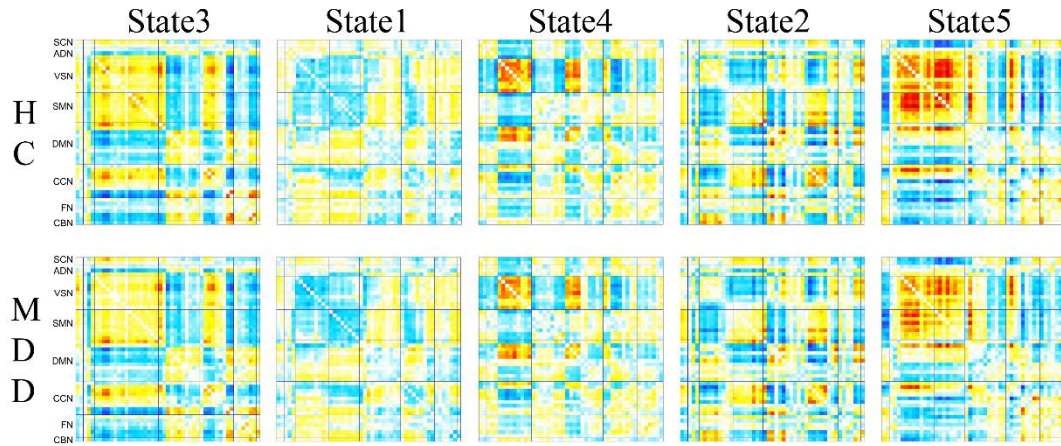

**Figure S2. Five identified dFNC states in HC and MDD group.** The results showed that HC and MDD had similar dFNC states during rest.

### Within-network connectivity

After GIG-ICA, one-sample t-tests ( $p < 0.05$ , family-wise error [FWE] whole-brain corrected) were conducted on each network across groups to create a mask for each network (Schmaal et al., 2013; Zhao et al., 2017). Then a two-sample t-test was performed to compare the coactivation difference within each network mask between MDD patients and HCs with a statistical significance level of  $p < 0.05$  (FWE-corrected) and cluster  $> 270 \text{ mm}^3$ , with sites, gender and age as nuisance covariates (Zhao et al., 2017).

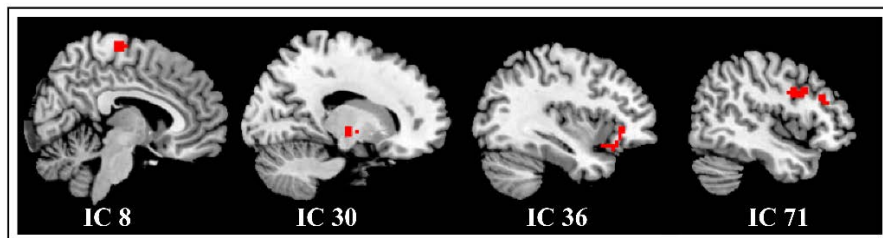

**Figure S3. ICNs with within-network connectivity difference between MDD patients and HCs ( $p < 0.05$ , FWE-corrected).**

### A The five identified dFNC states

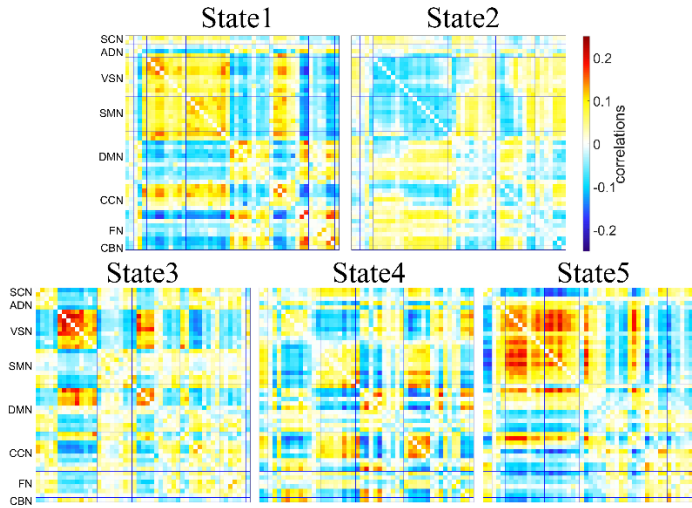

### B

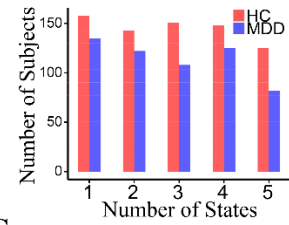

### C

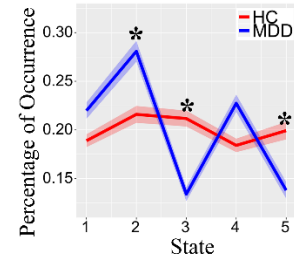

**Figure S4. The results of dFNC on age and gender-matched samples. A** The five identified dFNC states using the k-means clustering method. **B** The number of subjects in each state. **C** The group difference in the percentage of occurrence in each state. Asterisk indicates  $p < 0.05$  (FDR corrected).

**Table S1. Demographic and clinical details of all the subjects for each site**

| Mean $\pm$ SD                | MDD             |                 |                | HC              |                |                |
|------------------------------|-----------------|-----------------|----------------|-----------------|----------------|----------------|
|                              | Site 1          | Site 2          | Site 3         | Site 1          | Site 2         | Site 3         |
| <b>Number</b>                | 83              | 70              | 29             | 120             | 69             | 29             |
| <b>Age</b>                   | 29.6 $\pm$ 10.1 | 33.7 $\pm$ 10.5 | 35.0 $\pm$ 9.0 | 27.7 $\pm$ 8.2  | 32.4 $\pm$ 8.1 | 29.9 $\pm$ 7.3 |
| <b>Gender(M/F)</b>           | 29/54           | 23/47           | 11/18          | 39/81           | 25/44          | 12/17          |
| <b>Clinical score</b>        |                 |                 |                |                 |                |                |
| <b>HAMD</b>                  | 22.8 $\pm$ 4.1  | 24.1 $\pm$ 6.3  | 18.0 $\pm$ 3.7 | NA              | NA             | NA             |
| <b>BDI</b>                   | NA              | 21.0 $\pm$ 7.1  | NA             | NA              | NA             | NA             |
| <b>Cognitive performance</b> |                 |                 |                |                 |                |                |
| <b>RVP</b>                   | 16.8 $\pm$ 5.4  | NA              | NA             | 18.3 $\pm$ 5.6  | NA             | NA             |
| <b>SWM</b>                   | 33.5 $\pm$ 5.7  | NA              | NA             | 33.3 $\pm$ 4.6  | NA             | NA             |
| <b>IED</b>                   | 23.5 $\pm$ 12.6 | NA              | NA             | 22.9 $\pm$ 12.4 | NA             | NA             |

*Note:* MDD: major depressive disorder; HC: healthy control; Site 1: West China Hospital of Sichuan; Site 2: Henan Mental Hospital of Xinxiang; Site 3: First Affiliated Hospital of Zhejiang; SD: standard deviation; HAMD: Hamilton Depression Scale; BDI: Beck Depression Rating Scale; RVP: Rapid Visual Information Processing; SWM: Spatial Working Memory; IED: Intra-Extra Dimensional Set Shift; F: female; M: male; NA: not applicable

**Table S2.** Mathematical definitions of network properties of a given network  $G(N, V)$ , including global and local efficiency, node strength and harmonic centrality.  $N$  is the set of all nodes in the network and  $n$  is the number of nodes.  $V$  is the set of all links.

| Network properties       | Definitions                                                                                  | Descriptions                                                                                             |
|--------------------------|----------------------------------------------------------------------------------------------|----------------------------------------------------------------------------------------------------------|
| <b>Global properties</b> | Global efficiency<br>$E_{glob}(G) = \frac{1}{n(n-1)} \sum_{i \neq j \in N} \frac{1}{d_{ij}}$ | $d_{ij}$ is the shortest path length between node $i$ and node $j$ in $G$ .                              |
|                          | Local efficiency<br>$E_{local}(G) = \frac{1}{n} \sum_{i \in N} E_{glob}(G_i)$                | $E_{glob}(G_i)$ is the global efficiency of $G_i$ , the subgraph composed of the neighbors of node $i$ . |
| <b>Node properties</b>   | Nodal strength<br>$S_i = \sum_{j \in N} w_{ij}$                                              | $w_{ij}$ is the edge weight between node $i$ and node $j$ .                                              |
|                          | Harmonic centrality<br>$E_i = \frac{1}{n-1} \sum_{j \neq i \in N} \frac{1}{d_{ij}}$          | $d_{ij}$ is the shortest path length between node $i$ and node $j$ in $G$ .                              |

**Table S3. Talairach labels of the peak activations in spatial maps of 49 selected intrinsic connectivity networks (ICNs).**

| Area                        | Brodman Area       | Vol(cc)  | L/R | Random Effects: Max Value (x, y, z)  |
|-----------------------------|--------------------|----------|-----|--------------------------------------|
| <b>Subcortical networks</b> |                    |          |     |                                      |
| IC 6                        |                    |          |     |                                      |
| Lentiform Nucleus           | *                  | 7.2/6.8  |     | 7.7 (-24, 3, 0)/7.5 (27, 3, 0)       |
| IC 30                       |                    |          |     |                                      |
| Thalamus                    | *                  | 4.5/4.0  |     | 6.4 (-12, -15, 1)/6.3 (12, -15, 1)   |
| <b>Auditory networks</b>    |                    |          |     |                                      |
| IC 59                       |                    |          |     |                                      |
| Middle Temporal Gyrus       | 21, 22, 39         | 0.0/5.8  |     | -999.0 (0, 0, 0)/4.9 (59, -46, 8)    |
| Superior Temporal Gyrus     | 13, 22, 39         | 0.0/5.8  |     | -999.0 (0, 0, 0)/4.8 (56, -46, 11)   |
| IC 92                       |                    |          |     |                                      |
| Superior Temporal Gyrus     | 13, 21, 22, 41, 42 | 11.6/8.9 |     | 5.4 (-53, -20, 4)/5.1 (56, -15, 1)   |
| Transverse Temporal Gyrus   | 41                 | 0.6/0.3  |     | 4.7 (-45, -29, 10)/4.1 (50, -26, 10) |
| Middle Temporal Gyrus       | 21, 22             | 0.9/1.7  |     | 4.3 (-53, -32, 4)/4.4 (56, -9, -5)   |
| IC 94                       |                    |          |     |                                      |
| Middle Temporal Gyrus       | 21, 22             | 10.1/1.0 |     | 5.4 (-50, -32, -3)/3.8 (53, -27, -6) |
| Superior Temporal Gyrus     | 21                 | 0.2/0.0  |     | 3.9 (-62, -23, -1)/-999.0 (0, 0, 0)  |
| Inferior Temporal Gyrus     | 21                 | 0.1/0.0  |     | 3.7 (-56, -9, -15)/-999.0 (0, 0, 0)  |
| <b>Visual networks</b>      |                    |          |     |                                      |
| IC 5                        |                    |          |     |                                      |
| Cuneus                      | 17, 18             | 3.3/3.3  |     | 6.6 (-24, -96, 2)/6.1 (21, -96, 2)   |
| Middle Occipital Gyrus      | 18, 19             | 2.9/4.0  |     | 6.5 (-21, -99, 5)/6.4 (24, -96, 5)   |
| IC 15                       |                    |          |     |                                      |
| Cuneus                      | 17, 18, 19, 23, 30 | 9.6/11.1 |     | 6.1 (-3, -87, 7)/6.3 (3, -87, 7)     |
| Lingual Gyrus               | 17, 18             | 3.0/2.4  |     | 6.1 (0, -87, 4)/5.9 (3, -84, 4)      |
| IC 29                       |                    |          |     |                                      |
| Middle Occipital Gyrus      | 18, 19             | 4.4/7.0  |     | 5.1 (-21, -92, 21)/5.8 (24, -89, 21) |
| Cuneus                      | 18, 19             | 3.4/6.7  |     | 5.0 (-18, -95, 21)/5.7 (21, -92, 21) |
| IC 32                       |                    |          |     |                                      |
| Middle Occipital Gyrus      | 19, 37             | 2.9/3.2  |     | 4.7 (-48, -70, 3)/5.2 (50, -67, 3)   |
| Inferior Temporal Gyrus     | 18, 19, 37         | 1.3/1.2  |     | 4.5 (-50, -70, 1)/5.0 (50, -64, 1)   |
| Middle Temporal Gyrus       | 21, 37, 39         | 2.1/4.7  |     | 4.5 (-48, -67, 6)/5.0 (53, -64, 3)   |
| IC 38                       |                    |          |     |                                      |

|                              |                   |          |                                        |
|------------------------------|-------------------|----------|----------------------------------------|
| Fusiform Gyrus               | 19, 20, 37        | 4.4/4.3  | 5.7 (-33, -44, -13)/5.5 (30, -44, -13) |
| Culmen                       | *                 | 2.5/2.8  | 5.7 (-30, -44, -15)/5.3 (30, -50, -13) |
| Parahippocampal Gyrus        | 19, 36, 37        | 1.2/0.8  | 5.7 (-30, -44, -10)/5.2 (33, -44, -10) |
| IC 40                        |                   |          |                                        |
| Superior Occipital Gyrus     | 19, 39            | 1.3/1.7  | 4.5 (-33, -80, 29)/5.6 (36, -77, 31)   |
| Precuneus                    | 7, 19, 39         | 1.3/4.5  | 4.3 (-30, -77, 34)/5.4 (36, -74, 34)   |
| Middle Temporal Gyrus        | 19, 39            | 0.2/1.9  | 3.6 (-39, -80, 23)/5.2 (42, -74, 29)   |
| IC 56                        |                   |          |                                        |
| Cuneus                       | 7, 18, 19         | 8.6/8.9  | 6.0 (0, -80, 29)/6.0 (3, -77, 29)      |
| Precuneus                    | 7, 18, 19, 31     | 1.9/3.9  | 5.4 (0, -74, 29)/5.7 (3, -74, 26)      |
| IC 58                        |                   |          |                                        |
| Lingual Gyrus                | 17, 18, 19        | 4.7/9.5  | 4.9 (-21, -73, -4)/6.3 (21, -73, -1)   |
| Fusiform Gyrus               | 19, 37            | 0.4/2.0  | 4.2 (-24, -67, -7)/5.4 (27, -67, -7)   |
| IC 70                        |                   |          |                                        |
| Fusiform Gyrus               | 18, 19            | 1.7/1.5  | 4.4 (-24, -76, -14)/4.4 (27, -76, -14) |
| Lingual Gyrus                | 18                | 1.5/2.3  | 4.4 (-18, -79, -11)/4.4 (12, -85, -11) |
| Declive                      | *                 | 3.7/3.0  | 4.3 (-12, -79, -11)/4.4 (21, -76, -11) |
| <b>Sensorimotor networks</b> |                   |          |                                        |
| IC 3                         |                   |          |                                        |
| Precentral Gyrus             | 3, 4, 6, 9, 43    | 9.1/8.6  | 7.1 (-53, -7, 28)/6.9 (53, -5, 25)     |
| Postcentral Gyrus            | 3, 43             | 3.0/1.4  | 6.4 (-53, -10, 25)/5.6 (62, -5, 17)    |
| IC 7                         |                   |          |                                        |
| Precentral Gyrus             | 4, 6              | 0.0/11.1 | -999.0 (0, 0, 0)/6.6 (36, -21, 51)     |
| Postcentral Gyrus            | 1, 2, 3, 4, 5, 40 | 0.0/8.5  | -999.0 (0, 0, 0)/6.4 (39, -24, 51)     |
| IC 8                         |                   |          |                                        |
| Medial Frontal Gyrus         | 6                 | 3.7/4.5  | 6.7 (-3, -23, 59)/6.7 (3, -23, 59)     |
| Paracentral Lobule           | 3, 4, 5, 6        | 3.3/2.8  | 6.5 (-3, -29, 59)/6.3 (3, -29, 59)     |
| Postcentral Gyrus            | 3, 4, 5           | 1.8/2.0  | 5.6 (-12, -35, 63)/5.6 (12, -35, 63)   |
| Precentral Gyrus             | 4, 6              | 1.3/1.4  | 5.3 (-9, -23, 65)/5.3 (12, -26, 65)    |
| IC 16                        |                   |          |                                        |
| Precentral Gyrus             | 4, 6              | 9.8/0.0  | 6.6 (-36, -24, 51)/-999.0 (0, 0, 0)    |
| Postcentral Gyrus            | 1, 2, 3, 40       | 9.2/0.0  | 6.6 (-39, -21, 51)/-999.0 (0, 0, 0)    |
| IC 22                        |                   |          |                                        |
| Medial Frontal Gyrus         | 6                 | 1.1/1.3  | 5.6 (-3, -14, 67)/5.6 (3, -14, 67)     |
| Superior Frontal Gyrus       | 6                 | 1.2/1.2  | 4.8 (-9, -14, 67)/5.1 (6, -5, 67)      |

|                              |                |         |                                        |
|------------------------------|----------------|---------|----------------------------------------|
| Precentral Gyrus             | 4, 6           | 0.6/0.6 | 4.6 (-9, -20, 67)/4.5 (12, -17, 67)    |
| IC 24                        |                |         |                                        |
| Middle Frontal Gyrus         | 6              | 2.6/2.9 | 6.0 (-15, -9, 61)/5.9 (18, -6, 61)     |
| Medial Frontal Gyrus         | 6              | 3.3/3.4 | 5.9 (-12, -6, 61)/5.7 (15, -3, 61)     |
| Superior Frontal Gyrus       | 6              | 2.0/2.4 | 5.2 (-15, -11, 64)/5.1 (18, -8, 64)    |
| IC 42                        |                |         |                                        |
| Postcentral Gyrus            | 1, 2, 3, 4, 40 | 4.9/3.7 | 5.7 (-50, -27, 40)/4.7 (53, -21, 40)   |
| Inferior Parietal Lobule     | 40             | 5.2/1.0 | 5.5 (-48, -30, 40)/4.4 (45, -30, 43)   |
| IC 44                        |                |         |                                        |
| Precentral Gyrus             | 4, 6, 9        | 6.4/4.9 | 5.3 (-45, -7, 42)/5.0 (48, -4, 42)     |
| Middle Frontal Gyrus         | 6, 8, 9        | 1.3/2.3 | 4.6 (-39, -4, 44)/4.8 (45, -1, 41)     |
| <b>Default-mode networks</b> |                |         |                                        |
| IC 25                        |                |         |                                        |
| Uncus                        | 20, 28, 36, 38 | 2.6/2.8 | 5.0 (-27, -4, -30)/4.7 (27, -5, -33)   |
| Middle Temporal Gyrus        | 21, 38         | 2.4/1.3 | 4.7 (-36, -2, -33)/4.4 (33, 4, -36)    |
| IC 26                        |                |         |                                        |
| Precuneus                    | 7              | 9.0/9.5 | 6.1 (0, -53, 47)/6.2 (3, -56, 47)      |
| IC 37                        |                |         |                                        |
| Posterior Cingulate          | 23, 29, 30, 31 | 5.8/5.5 | 6.2 (-12, -55, 17)/6.2 (12, -54, 19)   |
| Precuneus                    | 7, 23, 31      | 3.6/1.9 | 6.1 (-9, -60, 20)/5.9 (12, -57, 22)    |
| IC 37                        |                |         |                                        |
| Posterior Cingulate          | 23, 29, 30, 31 | 5.8/5.5 | 6.2 (-12, -55, 17)/6.2 (12, -54, 19)   |
| Precuneus                    | 7, 23, 31      | 3.6/1.9 | 6.1 (-9, -60, 20)/5.9 (12, -57, 22)    |
| IC 49                        |                |         |                                        |
| Posterior Cingulate          | 18, 30, 31     | 3.1/4.3 | 5.5 (-12, -66, 12)/5.9 (18, -66, 12)   |
| Cuneus                       | 17, 18, 23, 30 | 6.5/7.2 | 5.7 (-15, -69, 12)/5.8 (15, -69, 12)   |
| IC 60                        |                |         |                                        |
| Cingulate Gyrus              | 24, 32         | 5.6/7.2 | 5.7 (-3, 8, 41)/5.6 (6, 11, 41)        |
| Medial Frontal Gyrus         | 6, 8, 32       | 1.6/2.2 | 5.6 (0, 8, 44)/5.5 (3, 11, 44)         |
| IC 61                        |                |         |                                        |
| Parahippocampal Gyrus        | 28, 34, 35, 36 | 6.6/6.1 | 5.1 (-27, -10, -17)/4.9 (21, -15, -17) |
| IC 67                        |                |         |                                        |
| Superior Frontal Gyrus       | 6, 8           | 7.4/6.7 | 5.4 (-18, 17, 49)/5.2 (15, 20, 49)     |
| Medial Frontal Gyrus         | 6, 8, 32       | 2.0/1.4 | 5.1 (-12, 20, 46)/4.7 (15, 17, 46)     |
| Middle Frontal Gyrus         | 6, 8           | 2.4/1.5 | 4.9 (-24, 14, 46)/4.6 (24, 20, 46)     |



|                                   |                |          |                                      |
|-----------------------------------|----------------|----------|--------------------------------------|
| IC 73                             |                |          |                                      |
| Medial Frontal Gyrus              | 9, 10          | 1.7/0.0  | 4.1 (-3, 56, 8)/-999.0 (0, 0, 0)     |
| Superior Frontal Gyrus            | 8, 9           | 1.1/0.0  | 3.9 (-18, 43, 39)/-999.0 (0, 0, 0)   |
| IC 75                             |                |          |                                      |
| Precuneus                         | 7, 19, 31      | 9.5/10.0 | 6.7 (-9, -68, 34)/6.7 (12, -65, 34)  |
| Cuneus                            | 7, 18, 19      | 1.3/0.8  | 6.2 (-9, -65, 31)/5.9 (9, -65, 31)   |
| IC 79                             |                |          |                                      |
| Cingulate Gyrus                   | 23, 24, 31     | 9.4/9.9  | 6.2 (-6, -25, 32)/6.1 (6, -25, 32)   |
| IC 96                             |                |          |                                      |
| Anterior Cingulate                | 10, 24, 32, 33 | 6.9/7.8  | 6.3 (-3, 35, 9)/6.3 (3, 38, 12)      |
| Medial Frontal Gyrus              | 9, 10, 32      | 2.4/2.9  | 5.5 (-3, 42, 15)/5.6 (3, 42, 15)     |
| <b>Cognitive control networks</b> |                |          |                                      |
| IC 34                             |                |          |                                      |
| Superior Parietal Lobule          | 5, 7           | 2.2/2.0  | 5.8 (-18, -49, 61)/5.6 (18, -49, 61) |
| Postcentral Gyrus                 | 2, 5, 7, 40    | 2.9/3.1  | 5.5 (-21, -49, 63)/5.4 (21, -49, 63) |
| IC 36                             |                |          |                                      |
| Inferior Frontal Gyrus            | 13, 45, 47     | 3.1/6.0  | 5.3 (-33, 20, -4)/6.2 (33, 23, -6)   |
| Insula                            | 13, 47         | 2.6/2.0  | 5.0 (-33, 17, -1)/5.2 (33, 17, -6)   |
| IC 46                             |                |          |                                      |
| Inferior Parietal Lobule          | 7, 39, 40      | 0.0/3.8  | -999.0 (0, 0, 0)/5.8 (48, -62, 39)   |
| Angular Gyrus                     | 39             | 0.0/2.0  | -999.0 (0, 0, 0)/5.6 (48, -65, 36)   |
| Supramarginal Gyrus               | 40             | 0.0/2.6  | -999.0 (0, 0, 0)/5.2 (53, -60, 33)   |
| IC 63                             |                |          |                                      |
| Insula                            | 13, 40, 41     | 3.0/2.2  | 5.1 (-48, -34, 21)/5.0 (50, -28, 21) |
| Postcentral Gyrus                 | 40, 43         | 1.6/2.2  | 4.8 (-53, -28, 21)/5.0 (53, -28, 18) |
| Inferior Parietal Lobule          | 40             | 2.2/2.0  | 4.9 (-50, -34, 24)/4.9 (50, -31, 24) |
| Superior Temporal Gyrus           | 13, 41, 42     | 2.0/1.5  | 4.5 (-53, -28, 15)/4.6 (56, -28, 15) |
| IC 80                             |                |          |                                      |
| Inferior Frontal Gyrus            | 9, 44, 45, 46  | 0.0/5.6  | -999.0 (0, 0, 0)/4.7 (50, 13, 19)    |
| Inferior Parietal Lobule          | 40             | 0.0/6.7  | -999.0 (0, 0, 0)/4.7 (48, -38, 46)   |
| IC 81                             |                |          |                                      |
| Superior Parietal Lobule          | 7              | 4.2/2.9  | 5.4 (-27, -62, 47)/4.4 (30, -59, 47) |
| Inferior Parietal Lobule          | 7, 39, 40      | 5.2/1.0  | 5.3 (-33, -56, 47)/4.4 (33, -56, 47) |
| Precuneus                         | 7              | 3.5/0.6  | 5.1 (-24, -67, 50)/3.8 (24, -56, 50) |
| IC 82                             |                |          |                                      |

|                           |                   |          |                                      |
|---------------------------|-------------------|----------|--------------------------------------|
| Inferior Parietal Lobule  | 7, 39, 40         | 5.3/1.1  | 5.7 (-53, -53, 39)/4.1 (56, -45, 38) |
| Supramarginal Gyrus       | 40                | 4.0/1.5  | 5.6 (-50, -54, 36)/4.2 (56, -48, 36) |
| Angular Gyrus             | 39                | 1.5/0.0  | 5.5 (-53, -56, 36)/-999.0 (0, 0, 0)  |
| <b>IC 83</b>              |                   |          |                                      |
| Insula                    | 13                | 0.0/6.5  | -999.0 (0, 0, 0)/5.3 (39, -2, 8)     |
| Clastrum                  | *                 | 0.0/1.0  | -999.0 (0, 0, 0)/5.1 (36, -5, 9)     |
| Precentral Gyrus          | 6, 13, 43, 44     | 0.0/2.4  | -999.0 (0, 0, 0)/5.0 (45, 0, 6)      |
| <b>IC 98</b>              |                   |          |                                      |
| Superior Frontal Gyrus    | 6, 8              | 4.2/1.7  | 6.0 (-3, 17, 57)/5.0 (3, 17, 57)     |
| Inferior Frontal Gyrus    | 47                | 0.8/0.0  | 3.9 (-48, 20, -4)/-999.0 (0, 0, 0)   |
| <b>Frontal networks</b>   |                   |          |                                      |
| <b>IC 2</b>               |                   |          |                                      |
| Rectal Gyrus              | 11                | 2.0/2.5  | 5.2 (-9, 34, -19)/5.3 (9, 34, -19)   |
| Inferior Frontal Gyrus    | 11, 47            | 2.9/2.5  | 5.2 (-12, 37, -20)/5.2 (12, 37, -20) |
| Medial Frontal Gyrus      | 11, 25            | 3.1/3.5  | 5.2 (-9, 31, -17)/5.1 (9, 31, -17)   |
| Orbital Gyrus             | 11, 47            | 1.9/1.8  | 5.1 (-6, 37, -20)/5.1 (6, 37, -20)   |
| <b>IC 18</b>              |                   |          |                                      |
| Middle Frontal Gyrus      | 10, 11            | 4.9/1.0  | 5.3 (-30, 55, -8)/4.2 (30, 55, -10)  |
| Superior Frontal Gyrus    | 10, 11            | 5.4/2.5  | 5.2 (-30, 58, -5)/4.3 (30, 58, -8)   |
| Inferior Frontal Gyrus    | 10, 45, 46        | 2.2/0.1  | 13.2 (-39, 52, 0)/5.1 (48, 47, 0)    |
| <b>IC 41</b>              |                   |          |                                      |
| Superior Frontal Gyrus    | 9, 10             | 3.6/5.1  | 5.0 (-27, 50, 14)/5.3 (30, 50, 14)   |
| Middle Frontal Gyrus      | 9, 10, 46         | 3.2/5.1  | 4.8 (-30, 50, 11)/5.2 (30, 53, 11)   |
| <b>IC 51</b>              |                   |          |                                      |
| Medial Frontal Gyrus      | 6, 8, 9, 10       | 2.4/4.8  | 4.5 (-3, 51, 22)/4.8 (3, 51, 22)     |
| Superior Frontal Gyrus    | 8, 9, 10          | 0.8/4.9  | 4.3 (-3, 54, 25)/4.7 (3, 48, 31)     |
| <b>IC 54</b>              |                   |          |                                      |
| Inferior Frontal Gyrus    | 9, 44, 45, 46, 47 | 14.5/0.0 | 5.3 (-50, 32, 4)/-999.0 (0, 0, 0)    |
| Middle Frontal Gyrus      | 11, 46            | 2.3/0.0  | 5.1 (-48, 38, -4)/-999.0 (0, 0, 0)   |
| Precentral Gyrus          | 44                | 0.3/0.0  | 4.4 (-50, 18, 7)/-999.0 (0, 0, 0)    |
| <b>IC 71</b>              |                   |          |                                      |
| Inferior Frontal Gyrus    | 6, 9, 44, 45      | 4.7/0.6  | 5.9 (-42, 10, 27)/4.0 (45, 16, 24)   |
| Middle Frontal Gyrus      | 9, 46             | 4.4/1.2  | 5.8 (-45, 13, 27)/4.1 (42, 13, 27)   |
| <b>Cerebellar network</b> |                   |          |                                      |
| <b>IC 21</b>              |                   |          |                                      |

|         |   |         |                                        |
|---------|---|---------|----------------------------------------|
| Uvula   | * | 2.0/2.0 | 4.9 (-33, -83, -24)/4.7 (21, -86, -23) |
| Tuber   | * | 2.6/2.4 | 4.7 (-36, -80, -24)/4.6 (33, -80, -29) |
| Declive | * | 1.9/2.1 | 4.7 (-24, -86, -21)/4.6 (18, -86, -21) |
| Pyramis | * | 2.2/1.6 | 4.5 (-33, -80, -31)/4.3 (30, -83, -31) |

**Table S4. Significant group differences in node properties between HC and MDD patients (FDR corrected,  $p < 0.001$ ).**

| State  | IC | $p\text{-Value} / \times 10^{-3}$ |                  |                     |                  |
|--------|----|-----------------------------------|------------------|---------------------|------------------|
|        |    | node strength                     |                  | harmonic centrality |                  |
| MDD<HC |    | Positive network                  | Negative network | Positive network    | Negative network |
|        | 7  | 0.244                             |                  |                     |                  |
|        | 16 | 0.382                             |                  | 0.859               |                  |
|        | 21 |                                   | 0.624            |                     |                  |
|        | 30 |                                   | 0.295            |                     | 0.581            |
| 2      | 34 | 0.063                             |                  | 0.289               |                  |
|        | 56 | 0.456                             |                  | 0.878               |                  |
|        | 58 | 0.092                             |                  | 0.364               |                  |
|        | 83 | 0.774                             |                  |                     |                  |
|        | 94 | 0.357                             |                  |                     |                  |
| 5      | 41 |                                   | 0.896            |                     |                  |

## Reference

- Schmaal, L., Goudriaan, A.E., Joos, L., Krüse, A.M., Dom, G., Van Den Brink, W., and Veltman, D.J. (2013). Modafinil modulates resting-state functional network connectivity and cognitive control in alcohol-dependent patients. *Biological psychiatry* 73, 789-795.
- Zhao, Z., Huang, T., Tang, C., Ni, K., Pan, X., Yan, C., Fan, X., Xu, D., and Luo, Y. (2017). Altered resting-state intra- and inter-network functional connectivity in patients with persistent somatoform pain disorder. *PloS one* 12, e0176494.
